# Supplementary material for: Pork Fat and Meat: A Balance between Consumer Expectations and Nutrient Composition of Four Pig Breeds
Source: MDPI journal article supplement (doi:10.3390/foods12040690), 2023-02-05
Supplement: s1 [file s1]

**Table S1.** Area and intensity of Raman spectra peaks of pork backfat

| Pig<br>breeds | Output    | Peak, $\text{cm}^{-1}$  |                          |                          |               |                       |
|---------------|-----------|-------------------------|--------------------------|--------------------------|---------------|-----------------------|
|               |           | 960-980                 | 1260-1280                | 1290-1310                | 1420-1470     | 1720-1760             |
| A             | Area      | 32863±6491 <sup>a</sup> | 94009±28975 <sup>a</sup> | 238663±8643              | 868534±143950 | 89433±44072           |
|               | Intensity | 2958±366 <sup>a</sup>   | 11524±1157 <sup>a</sup>  | 19052±932                | 30236±28      | 4572±235 <sup>a</sup> |
| D             | Area      | 14867±8002 <sup>b</sup> | 61144±60945              | 191120±7646 <sup>a</sup> | 754474±464776 | 83968±38212           |
|               | Intensity | 2959±1516 <sup>a</sup>  | 9817±2824 <sup>c</sup>   | 18673±2463 <sup>a</sup>  | 31093±1852    | 3846±476 <sup>b</sup> |
| L             | Area      | 16408±1133 <sup>b</sup> | 26789±7738 <sup>b</sup>  | 278295±7573 <sup>b</sup> | 914833±158254 | 106970±644            |
|               | Intensity | 1355±29 <sup>b</sup>    | 6951±189 <sup>b,d</sup>  | 20999±773 <sup>b</sup>   | 30185±232     | 4174±99               |
| M             | Area      | 21309±3231 <sup>b</sup> | 62617±22774              | 250018±1174 <sup>b</sup> | 765778±176441 | 108650±5027           |
|               | Intensity | 1755±248 <sup>b</sup>   | 8324±761 <sup>b</sup>    | 19272±786                | 30154±198     | 4218±217              |

\* a-b, c-d– Different letters indicate statistically significant differences ( $p \leq 0.05$ )
